# Supplementary material
Source: Elsevier journal article supplement (https://www.sciencedirect.com/science/article/pii/S0025775321003286)
Supplement: mmc1 [file S0025775321003286:mmc1.doc]

**MATERIAL SUPLEMENTARIO**: **INFORMACIÓN DE COSTES**

**Costes del circuito convencional**

Actualmente la solicitud de una prueba complementaria en pacientes del programa de atención domiciliaria requiere la intervención de múltiples profesionales y recursos1:

- Visita del médico de atención primaria al domicilio: 67€ (98€ si urgente).
- Transporte sanitario de ida: 52,21€.
- Ecografía abdominal en medio hospitalario: 62€.
- Transporte sanitario de vuelta: 52,21€.
- Segunda visita del médico de familia al domicilio para informar de los resultados y establecer un tratamiento: 67€.

El precio medio del transporte sanitario no urgente en todos los territorios de Cataluña es de 52,21€2. En el apartado anterior no figuran costes difícilmente deducibles como la tramitación administrativa, los sueldos del personal sanitario (médico, enfermería, técnicos y saladores) de primaria y hospitalaria, así como los costes indirectos para la familia y el sistema.

Basándonos únicamente en los precios descritos, e infraestimando la cifra debido a que se ha calculado mediante precios medios, actualmente la realización de una ecografía abdominal en un paciente incluido en el programa de atención domiciliara presenta un coste medio de 300,42€.

Debemos tener en cuenta la demora debido a la sobrecarga asistencial en el departamento de radiología del hospital, así como el riesgo secundario para el paciente frágil de acudir al medio hospitalario (riesgo de infección, desorientación, etc.). En cambio, es importante remarcar que en el circuito que proponemos el médico de atención primaria es el único profesional que interviene en este procedimiento.

**Costes del circuito propuesto y amortización**

En el modelo propuesto, en que se incluye el ecógrafo portátil en el maletín del médico de atención domiciliaria, contabilizamos:

- Visita del médico de atención primaria al domicilio: 67€ (98€ si urgente).
- Formación del médico: 1000-2000€.
- Coste de la ecografía.
- Material fungible: Gel transductor (0,73€/unidad 250mL), guantes, etc.

Actualmente disponemos de una gran oferta de ecógrafos portátiles con un amplio espectro de precios. Tomando de referencia el documento publicado en 2012 por la Sociedad Española de UltraSonido3, el coste de una ecografía se calcula mediante:

- Precio del dispositivo: 2000-10000€.
- 10% costes de mantenimiento.
- Demanda: calculamos 50 ecografías/año en nuestro caso.
- Amortización en años.

El período de amortización de los ecógrafos es de 6 años según el Plan General de Contabilidad y Cuentas4.

En el modelo de atención domiciliaria, la ecografía tendría un coste entre 74,3-103,7€ en visitas ordinarias y 105,3-134,7€ en visitas urgentes. No se ha tenido en cuenta el material fungible por ser difícilmente deducible y comportar un coste bajo. En caso de tener que formar a un médico se debería contabilizar el precio de la formación en el coste de la ecografía (entre 81-110,3€ en visitas ordinarias y 112-141,3€ en visitas urgentes), que también seria amortizado en un plazo de tiempo corto.

Una vez el dispositivo estuviera amortizado ya no comportaría gastos adicionales en años posteriores, por lo que únicamente se contabilizarían gastos básicos y la visita del médico.

**BIBLIOGRAFIA:**

1. Generalitat de Catalunya (2013)*. Resolución SLT/353/2013, De 13 De Febrero, Sobre La Revisión De Precios Públicos Correspondientes A Los Servicios Sanitarios Que Presta El Instituto Catalán de la Salud*.Diari Oficial de la Generalitat de Catalunya, Departament de Salut; 2013. CVEDOGC-B-13051031-2013.
2. Generalitat de Catalunya (2015). *Plec De Clàusules Econòmiques Per La Contractació De La Gestió De Serveis De Prestació Dels Serveis De Transport Sanitari En La Modalitat Urgent I No Urgent En El Territori De Catalunya, Excepte El Territori De L’Aran*.Departament de Salut; 2015. Expedient: TS/14 – Annex 2 PCE.
3. Morales Á., del Cura JL., Nicolau C., Remartínez E., Bueno Á., García P. Los costes de la ecografía. Documento SEUS 1-2012.
4. Gobierno de España (2007). *Real Decreto 1514/2007, De 16 De Noviembre, Por El Que Se Aprueba El Plan General De Contabilidad.* Ministerio de Economía y Hacienda; 2007. BOE: martes 20 de noviembre de 2007, suplemento del número 278.
